# Supplementary material
Source: PubMed Central journal article supplement (PMC9092305)
Supplement: mmc1.pdf [file mmc1.pdf]

## Supplemental Information

**sEVs<sup>RVG</sup> selectively delivers antiviral siRNA to fetus  
brain, inhibits ZIKV infection and mitigates ZIKV-  
induced microcephaly in mouse model**

**Rui Zhang, Yuxuan Fu, Min Cheng, Wenyuan Ma, Nan Zheng, Yongxiang Wang, and Zhiwei Wu**

Supplemental information

Figure S1

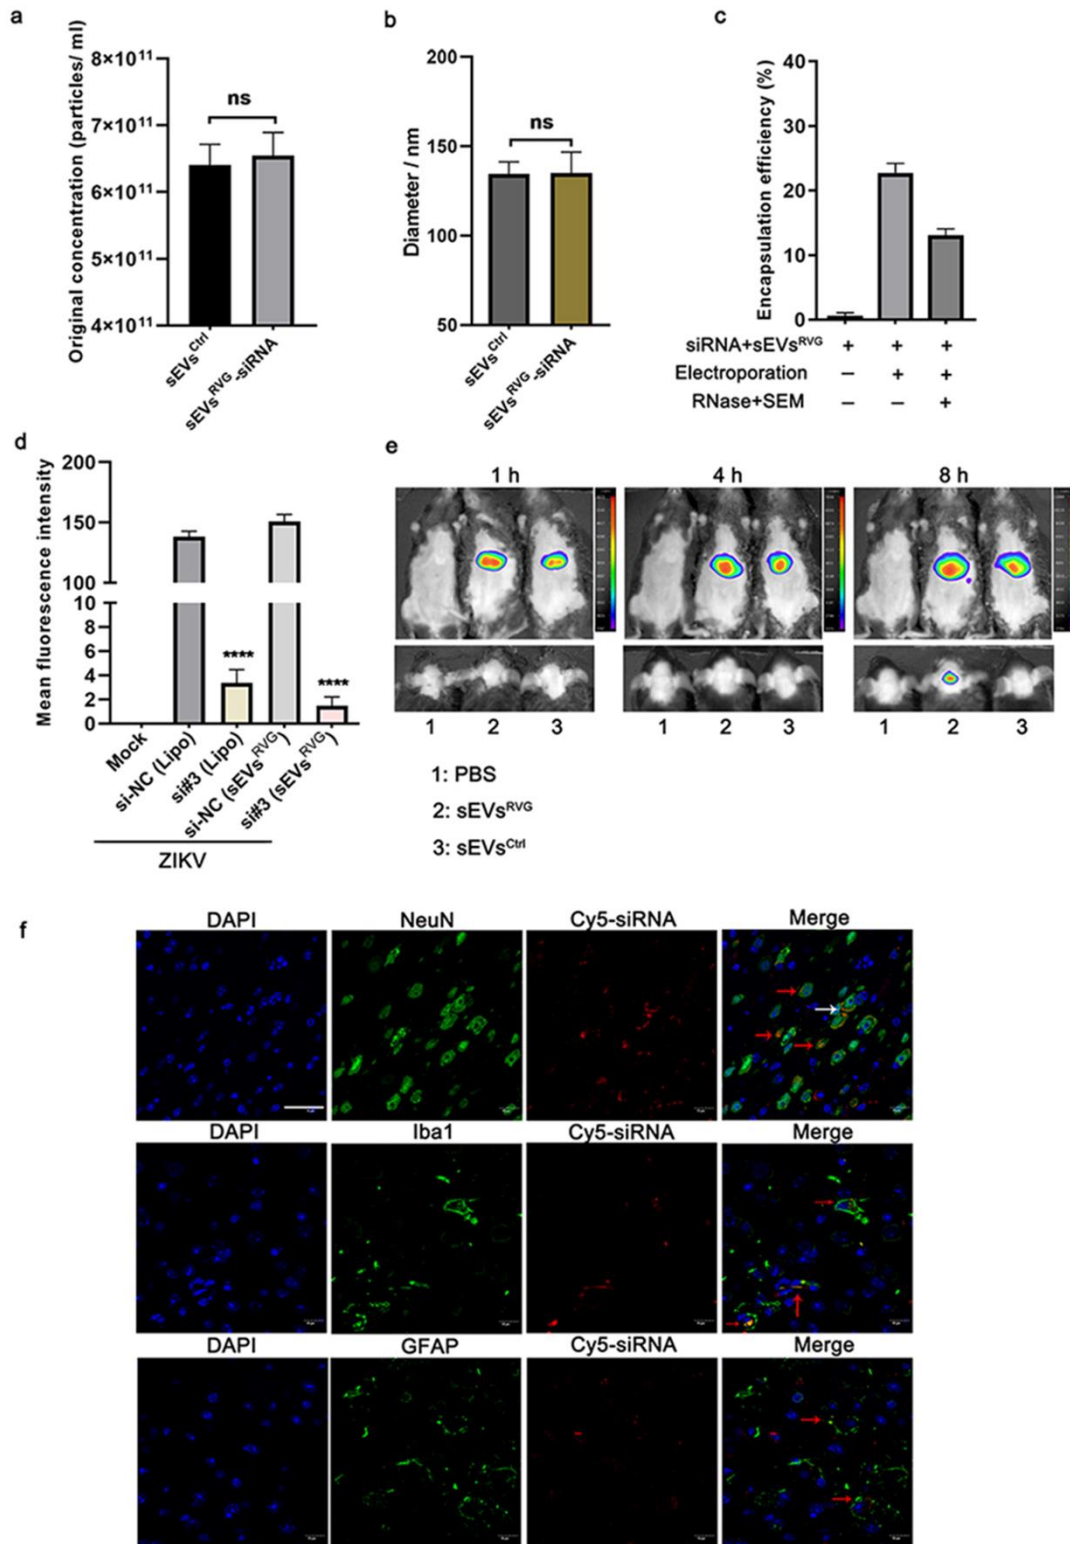

Figure S1 legend:

(a): Statistical analysis of particle concentrations in sEVs<sup>Ctrl</sup> and sEVs<sup>RVG</sup>-siRNA groups (ns represent no

significant). (b): Statistical analysis of particle diameter in sEVs<sup>Ctrl</sup> and sEVs<sup>RVG</sup>-siRNA groups (ns represent no significant). (c): Encapsulation efficiency of siRNA under different treatment conditions (RNase + SEM: RNase treatment and size exclusion chromatography filtration). (d): The mean fluorescence intensity (green) in Figure 2g was measured using Image J. Each group was taken from three random images for statistics (\*\*\*\*P < 0.0001). (e): Imaging of sEVs in mice injected with DiR-labeled sEVs<sup>Ctrl</sup>/ sEVs<sup>RVG</sup> at 1, 4, 8 h. (f): Representative images of cerebral cortex stained with primary antibodies against NeuN (neurons), GFAP (astrocytes) and Iba1 (microglias), a secondary antibody (green), cy5-siRNA (red) (scale bar: 30  $\mu$ m).

**Figure S2**

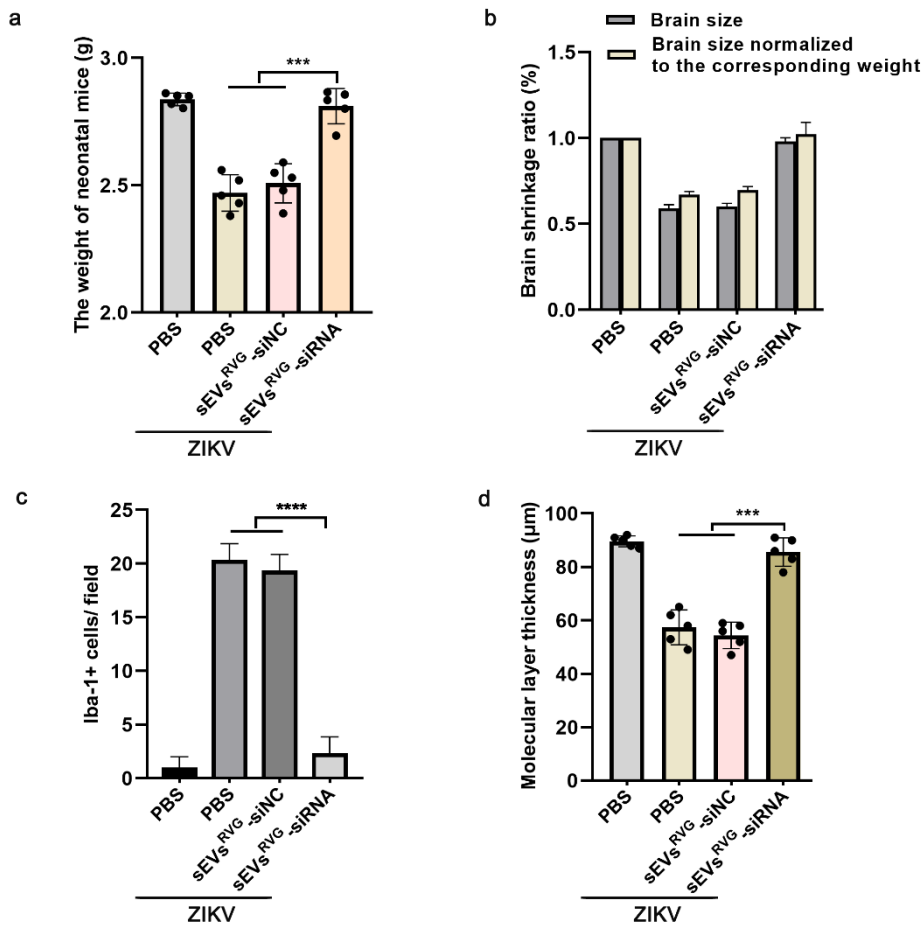

**Figure S2 legend:**

(a): The weight of neonatal mice (*P5*) from different groups in Figure 6a was measured (\*\*\*P < 0.001).  
 (b): Brain size of neonates in Figure 6a was calculated based on length \* width \* height. Brain shrinkage ratio was determined by comparison with the PBS group (grey column), and brain shrinkage ratio was corrected for the weight of each group (yellow column).  
 (c): The number of Iba1<sup>+</sup> cells per 20

magnification field was calculated, 3 different fields of each group were taken for the statistics (\*\*\*\*P < 0.0001). (d): Thickness of molecular layers was measured by Image J (\*\*\*P < 0.001). The analysis was analyzed using One-way ANOVA with Bonferroni's multiple comparisons test. All the data showed mean  $\pm$ SD from three experimental replicates.

**Figure S3**

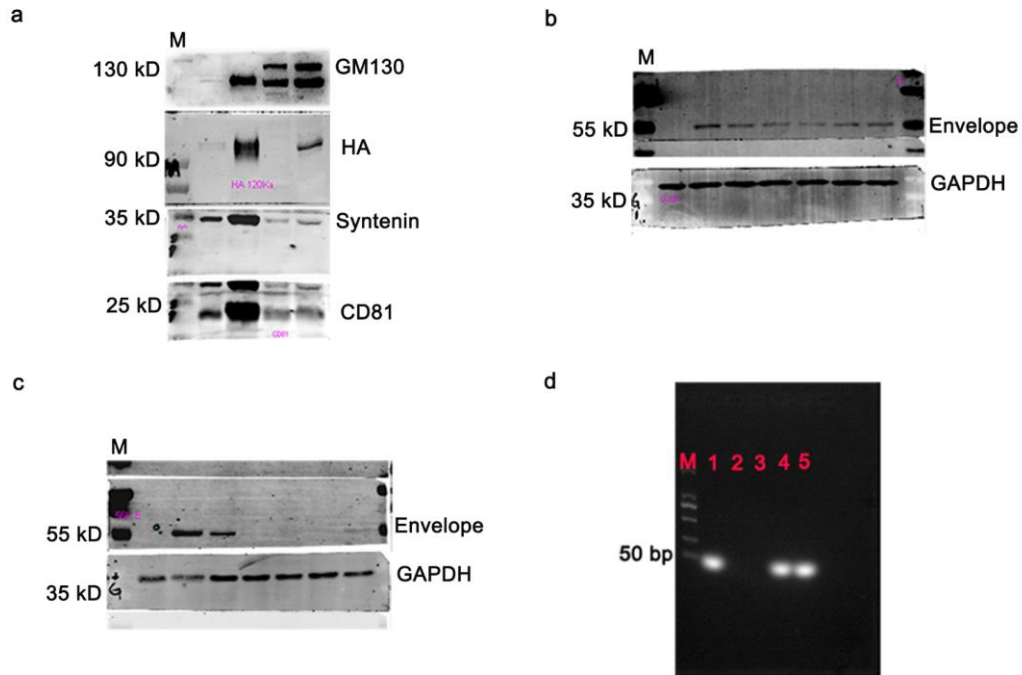

**Figure S3 legend:**

(a): The original image of Figure 1e. (b- c): Original images of Figure 2f and 2g. (d): The original DNA gel image of Figure 3e.

## Supplemental Tables

Table S1: Primers for Q-PCR experiments

| Primers | Sequence (5'-3')     |
|---------|----------------------|
| Forward | GAACATGGAGGTTGTGTCAC |
| Reverse | AGGTAGGCTTCACCTTGTGT |

Table S2: Primers required for cloning and confirmation of plasmid

| Primers | Sequence (5'-3')            |
|---------|-----------------------------|
| Forward | GCTAGCCGCAAATGGGCGGTAGGCGTG |
| Reverse | GGATCCTAGAAGGCACAGTCGAGG    |

Table S3: Stem-loop-specific reverse primers (RT reaction).

| Primers                 | Sequence (5'-3')                                          |
|-------------------------|-----------------------------------------------------------|
| Reverse_stemloop (si#3) | GTCGTATCCAGTGCAGGGTCCGAGGTATTTCGCACTGGA<br>TACGACAATTGAAA |
|                         |                                                           |
| Forward_si#3            | AGCCGGGATCTCCTCTGT                                        |
| Reverse_stemloop        | AGTGCAGGGTCCGAGGTATT                                      |
